# Supplementary material for: Simulation of the mid-Pliocene Warm Period using HadGEM3: experimental design and results from model–model and model–data comparison
Source: Copernicus journal article supplement (doi:10.5194/cp-17-2139-2021), 2021-10-18
Supplement: Supplementary file 1 [file cp-17-2139-2021-supplement.pdf]

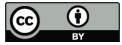

*Supplement of*

**Simulation of the mid-Pliocene Warm Period using HadGEM3:  
experimental design and results from model–model and  
model–data comparison**

**Charles J. R. Williams et al.**

*Correspondence to:* Charles J. R. Williams ([c.j.r.williams@bristol.ac.uk](mailto:c.j.r.williams@bristol.ac.uk))

The copyright of individual parts of the supplement might differ from the article licence.

# 1 TEXT

## 2 1. Model description

### 3 1.1. HadGEM2-AO

4 The immediate predecessor to HadGEM3 is the family of HadGEM2 models, all of which vary in  
5 terms of level of complexity but all of which have a common computational framework (Tindall and  
6 Haywood 2020, Martin *et al.* 2011), which HadGEM3 also shares. The most complex full Earth  
7 system version of the family, HadGEM2-ES, was included in the previous IPCC Assessment Report,  
8 AR5. Tindall and Haywood (2020) conducted a Pliocene simulation for PlioMIP1 using the fully  
9 coupled version of this model, HadGEM2-AO (hereafter referred to as HadGEM2). This model has  
10 the same atmospheric spatial resolution as HadGEM3, but only 38 atmospheric vertical levels; for full  
11 details on HadGEM2, see Collins *et al.* (2011), Martin *et al.* (2011) and Tindall and Haywood (2020).  
12 In contrast to the HadGEM3 *mPWP* simulation, the HadGEM2 Pliocene simulation uses dynamic  
13 vegetation from TRIFFID (Top-down Representation of Interactive Foliage and Flora Including  
14 Dynamics, see Cox 2001), and a previous iteration of the PRISM boundary conditions, PRISM3 (see  
15 Dowsett *et al.* 2007 and Dowsett *et al.* 2010). It should be noted that, whilst PRISM3 was mostly  
16 implemented in this model, this does not include the orography, which was the same as pre-industrial  
17 away from ice sheet regions. It should also be noted that the LSM used in this model differs slightly  
18 from both PRISM3 and HadGEM3 simulations, in that the Bering Sea, Canadian Archipelago and  
19 Hudson Bay gateways are all open (Tindall and Haywood 2020).

20

### 21 1.2. HadCM3

22 The original fully-coupled atmosphere-ocean version of the UK's physical climate model is HadCM3  
23 (Gordon *et al.* 2000), and over the years this has been used extensively for paleoclimate simulations  
24 and has been updated/optimised according to the simulation in question. Although no longer  
25 considered a state-of-the-art model, its fast speed and relatively cheap computational cost still makes  
26 it appropriate for paleoclimate simulations (Hunter *et al.* 2019) and, thanks to this, it has been  
27 included in every phase of CMIP to date. Both of the older HadCM3 simulations used here  
28 (HadCM3-PRISM2 and HadCM3-PlioMIP1) have an atmospheric resolution of 3.75° longitude by  
29 2.5° latitude with 19 vertical levels, and an ocean resolution of 1.25 ° longitude/latitude with 20  
30 vertical levels; for full details, see Gordon *et al.* (2000). For a land surface scheme, both of these  
31 simulations use the 1<sup>st</sup> generation Met Office Surface Exchange Scheme (MOSES1, see Cox *et al.*  
32 1999), and both use dynamic vegetation. Concerning boundary conditions, HadCM3-PRISM2  
33 predates PlioMIP1 and thus uses PRISM2, whereas HadCM3-PlioMIP1 was included in PlioMIP1  
34 and, similar to HadGEM2, uses PRISM3 boundary conditions.

35

### 36 1.3. PlioMIP2 models

37 The same 16 models as those in H16 are included here as a comparison to HadGEM3. These models,  
38 along with their spatial resolutions, are listed in Table 4; see Table 1 in H16 for full information  
39 (including boundary conditions, equilibrium climate sensitivity values and references) on each model.  
40 It should be noted that one of these models is HadCM3 but is slightly different to the earlier versions  
41 discussed here; the model, HadCM3-PlioMIP2, was run by Hunter *et al.* (2019) and is equivalent  
42 (concerning updates) to the version developed by Valdes *et al.* (2017), HadCM3B-M2.1 (which  
43 includes an updated land surface scheme, MOSES2, see Essery *et al.* 2001). In short, whereas  
44 MOSES1 treats each model grid point as a homogeneous surface and calculates energy and moisture  
45 fluxes using effective parameters, MOSES2 has subgrid heterogeneity and an improved representation  
46 of surface and plant processes (Hunter *et al.* 2019); see Valdes *et al.* (2017) for a complete  
47 comparison of MOSES1 and MOSES2. All of the models included in PlioMIP2 use PRISM4  
48 boundary conditions.

49

## 50 **2. Atmospheric equilibrium of Hadley Centre models**

51 As discussed in the main manuscript (Section 3.1.2), the fact that the 1.5 m air temperature, TOA  
52 radiation balance and ocean temperature/salinity are all still trending suggests that the HadGEM3  
53 *mPWP* simulation is not yet in full atmospheric or oceanic equilibrium. These values are repeated in  
54 Table S2, shown alongside the centennial temperature trends and mean TOA radiation balance from  
55 the other Hadley Centre models used here. All the other models appear to be closer to equilibrium,  
56 with all temperature trends below  $0.2^{\circ}\text{C century}^{-1}$  and all TOA radiation balances less than  $0.5 \text{ W m}^{-2}$ .  
57 The caveat that the HadGEM3 *mPWP* simulation is not in equilibrium (and therefore has further  
58 warming still to go, as discussed in the manuscript) whereas the other versions of the same UK model  
59 are closer to equilibrium should therefore be considered when making these comparisons.

60

61

## 62 TABLES

| Value | Mega biome                  | BLT  | NLT  | C3 Grass | C4 Grass | Shrubs | Urban | Lakes | Bare soil | Land ice |
|-------|-----------------------------|------|------|----------|----------|--------|-------|-------|-----------|----------|
| 1     | Tropical forest             | 0.92 | 0    | 0        | 0.02     | 0.01   | 0     | 0     | 0.05      | 0        |
| 2     | Warm-temperate forest       | 0.75 | 0    | 0.07     | 0.03     | 0.1    | 0     | 0     | 0.05      | 0        |
| 3     | Savanna and dry woodland    | 0.18 | 0    | 0        | 0.67     | 0.05   | 0     | 0     | 0.1       | 0        |
| 4     | Grassland and dry shrubland | 0.05 | 0    | 0        | 0.55     | 0.3    | 0     | 0     | 0.1       | 0        |
| 5     | Desert                      | 0    | 0    | 0        | 0.02     | 0.13   | 0     | 0     | 0.85      | 0        |
| 6     | Temperate forest            | 0    | 0.75 | 0.1      | 0        | 0.1    | 0     | 0     | 0.05      | 0        |
| 7     | Boreal forest               | 0    | 0.7  | 0.2      | 0        | 0.025  | 0     | 0     | 0.075     | 0        |
| 8     | Tundra                      | 0    | 0    | 0        | 0        | 0.4    | 0     | 0     | 0.6       | 0        |
| 9     | Dry tundra                  | 0    | 0    | 0        | 0        | 0.4    | 0     | 0     | 0.6       | 0        |
| 28    | Land ice                    | 0    | 0    | 0        | 0        | 0      | 0     | 0     | 0         | 1        |

63

64 Table S1 - Lookup table to translate mega biomes from PRISM3 into HadGEM3 PFTs. Values in  
65 first column correspond to those in Figure 2

66

| Model and simulation |                      | 1.5m air temperature trends (°C) | Mean TOA radiation (W m <sup>2</sup> ) |
|----------------------|----------------------|----------------------------------|----------------------------------------|
| HadCM3-PRISM2        | PI                   | 0.13                             | -0.14                                  |
|                      | Pliocene             | 0.19                             | 0.26                                   |
| HadCM3-PlioMIP1      | PI                   | 0.06                             | -0.09                                  |
|                      | Pliocene             | 0.01                             | 0.37                                   |
| HadCM3-PlioMIP2      | PI                   | 0.06                             | -0.11                                  |
|                      | Pliocene             | 0.01                             | 0.04                                   |
| HadGEM2              | PI                   | 0.05                             | 0.4                                    |
|                      | Pliocene             | 0.14                             | 0.48                                   |
| HadGEM3              | <i>piControl</i>     | 0.51                             | 0.18                                   |
|                      | <i>piControl_mod</i> | -0.47                            | 0.21                                   |
|                      | <i>mPWP</i>          | 0.34                             | 0.88                                   |

67

68 Table S2 - Centennial trends (calculated via a linear regression) and mean TOA radiation over the last  
69 50 years of the simulations from all the Hadley Centre models used here. Negative TOA radiation =  
70 net radiation flux is downward

71

72

73

74

75 **FIGURES**

76

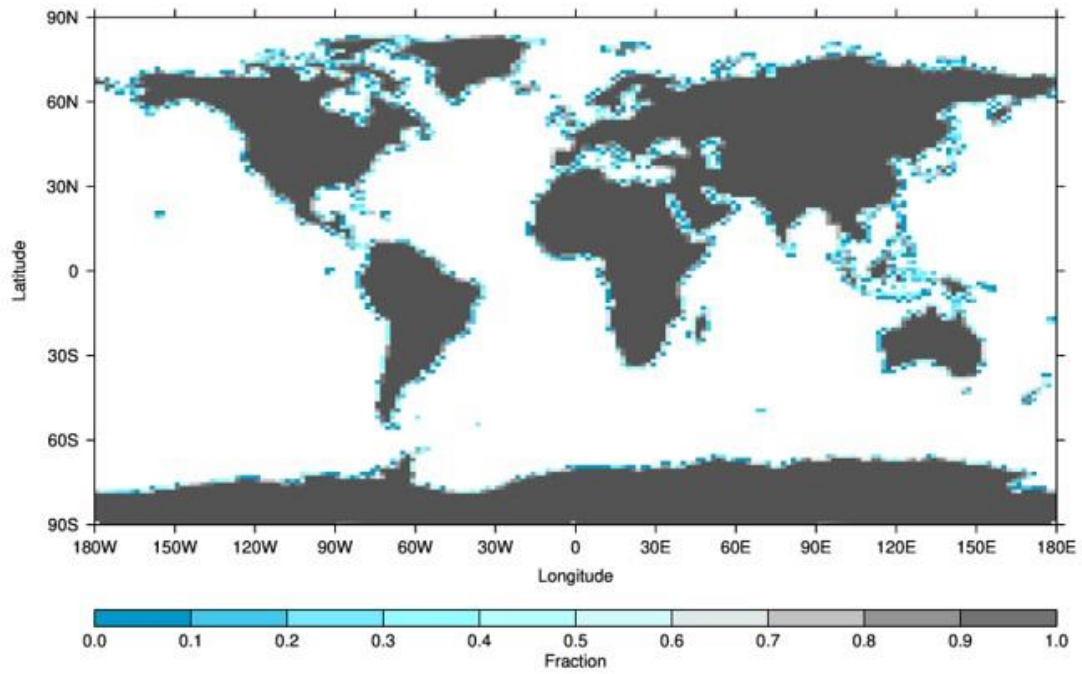

77

78 Figure S1 - Land sea mask used in HadGEM3 *mPWP* and *piControl* simulations, with colours  
79 showing fractional coverage of coastal grid points

80

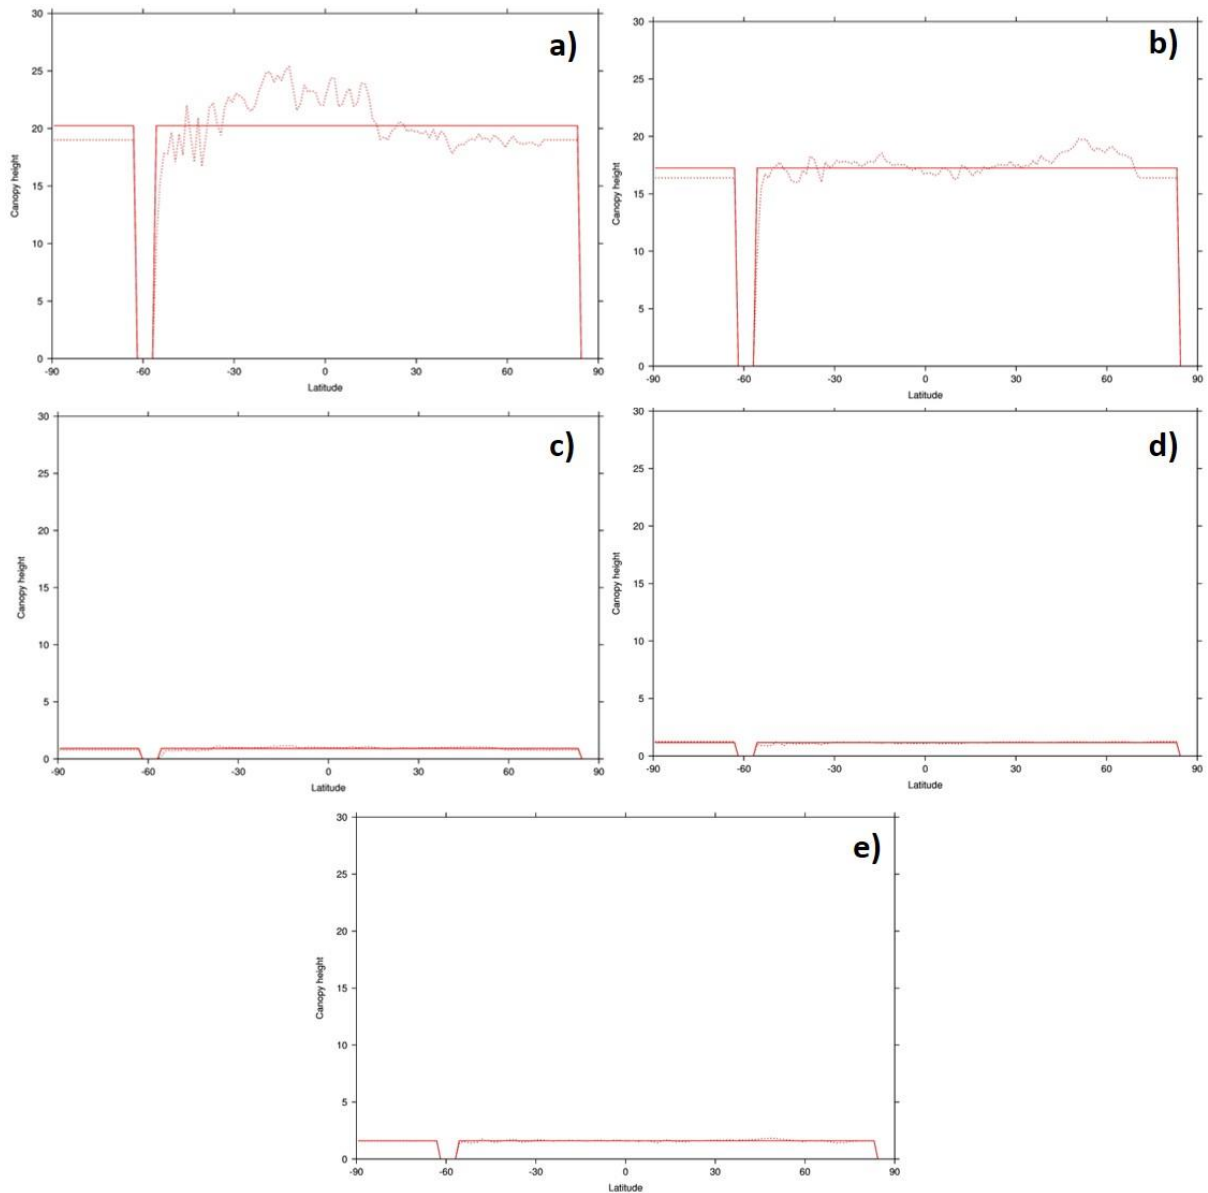

81

82 Figure S2 – Canopy height used in HadGEM3, for each PFT. Dashed lines show global mean from  
 83 *piControl* simulation, solid lines show latitudinally varying function of this global mean, used in  
 84 *mPWP* simulation. a) broadleaf trees; b) needle-leaved trees; c) temperate C3 grass; d) tropical C4  
 85 grass; e) shrubs

86

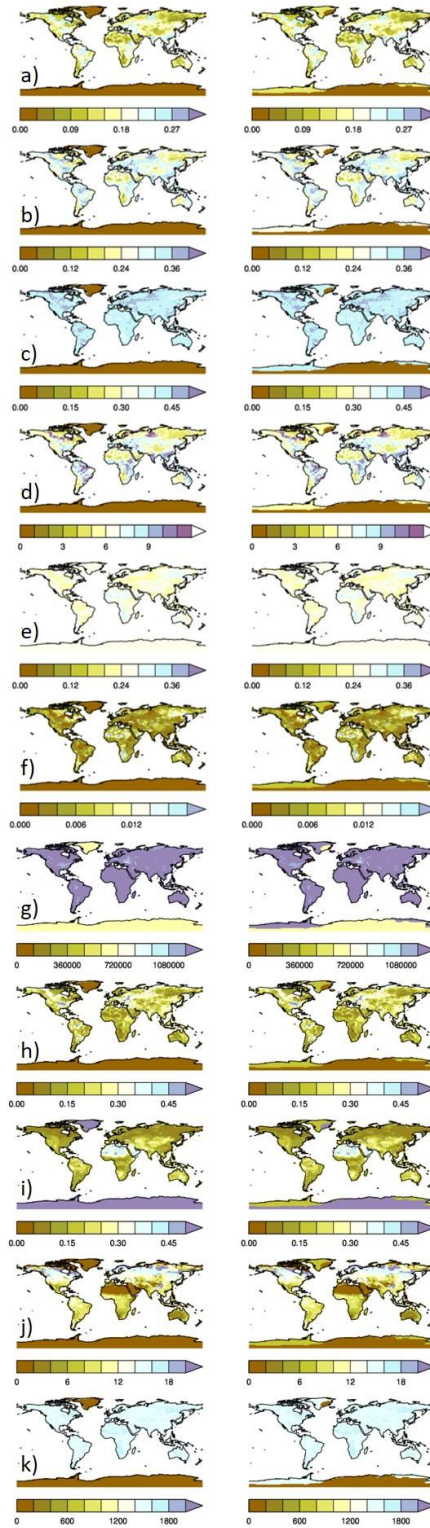

87

88 Figure S3 - Soil parameters used in HadGEM3. Left-hand column: *piControl* simulation, right-hand  
 89 column: *mPWP* simulation. a) Volume fraction of condensed water in soil at wilting point, b)  
 90 Volume fraction of condensed water in soil at critical point, c) Volume fraction of condensed water in  
 91 soil at saturation point, d) Clapp-Hornberger "B" coefficient, e) Thermal conductivity, f) Hydraulic  
 92 conductivity at saturation, g) Thermal capacity, h) Saturated soil water suction, i) Snow-free albedo of  
 93 soil, j) Soil carbon content, k) Soil bulk density

94



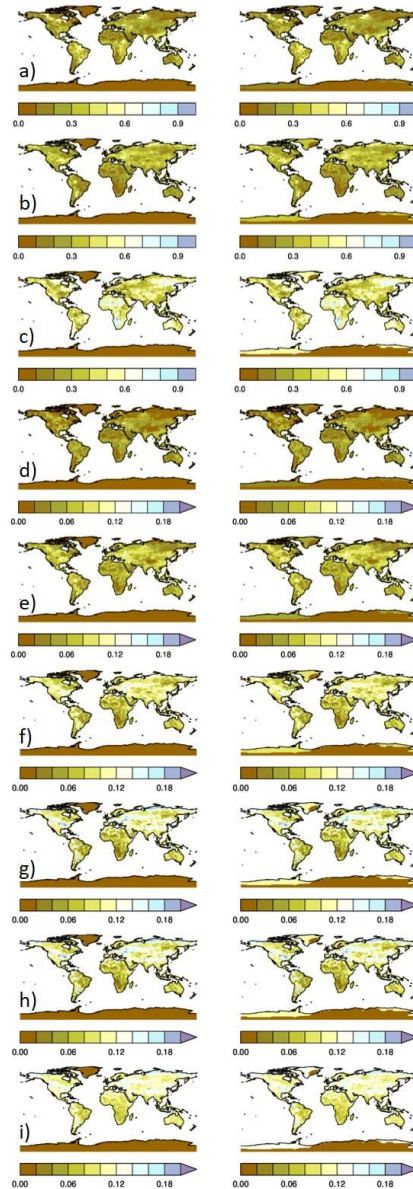

95

96 Figure S4 - Soil dust properties used in HadGEM3. Left-hand column: *piControl* simulation, right-  
 97 hand column: *mPWP* simulation. a) Dust parent soil clay fraction, b) Dust parent silt clay fraction, c)  
 98 Dust parent soil sand fraction, d) Dust soil mass fraction (Division 1), e) Dust soil mass fraction  
 99 (Division 2), f) Dust soil mass fraction (Division 3), g) Dust soil mass fraction (Division 4), h) Dust  
 100 soil mass fraction (Division 5), i) Dust soil mass fraction (Division 6)

101

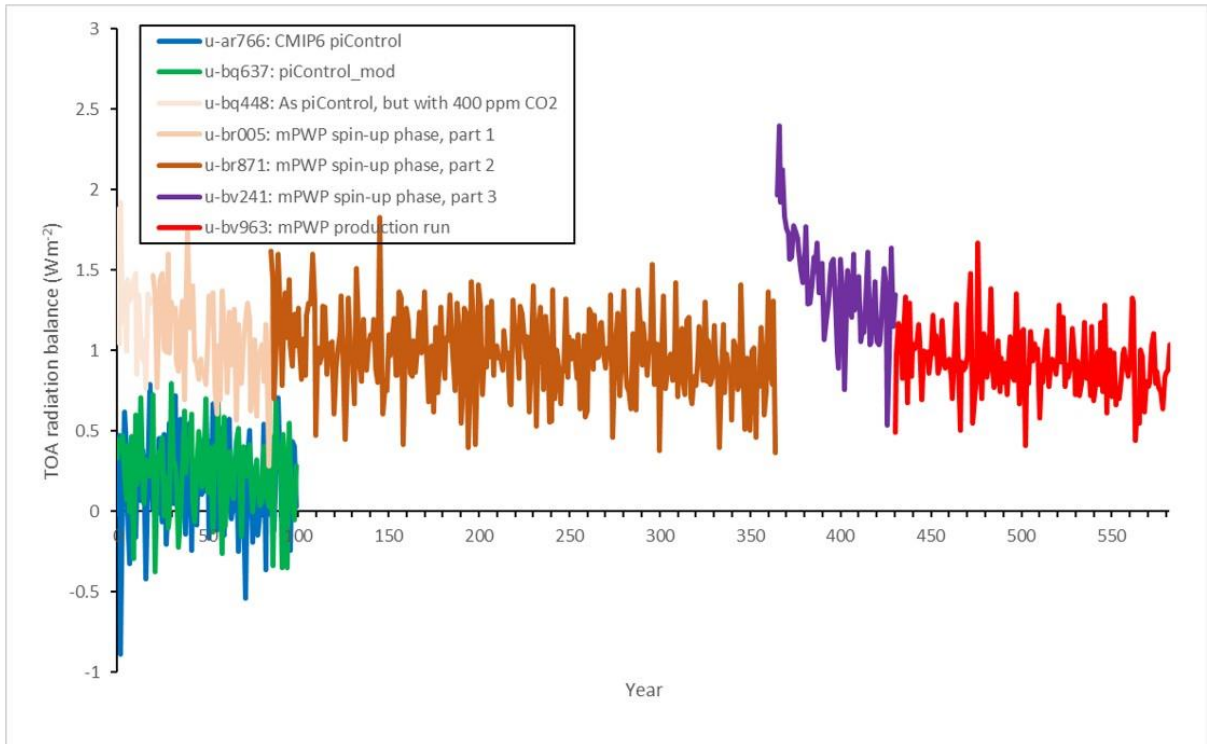

102  
103

104 Figure S5 – Annual global mean net top of atmosphere (TOA) radiation from the HadGEM3 *mPWP* spin-up  
 105 phase and production run, as well as the last 100 years from the CMIP6 *piControl* and the *piControl\_mod*. See  
 106 Williams *et al.* (2020) for the *piControl* spin-up phase that preceded this simulation  
 107

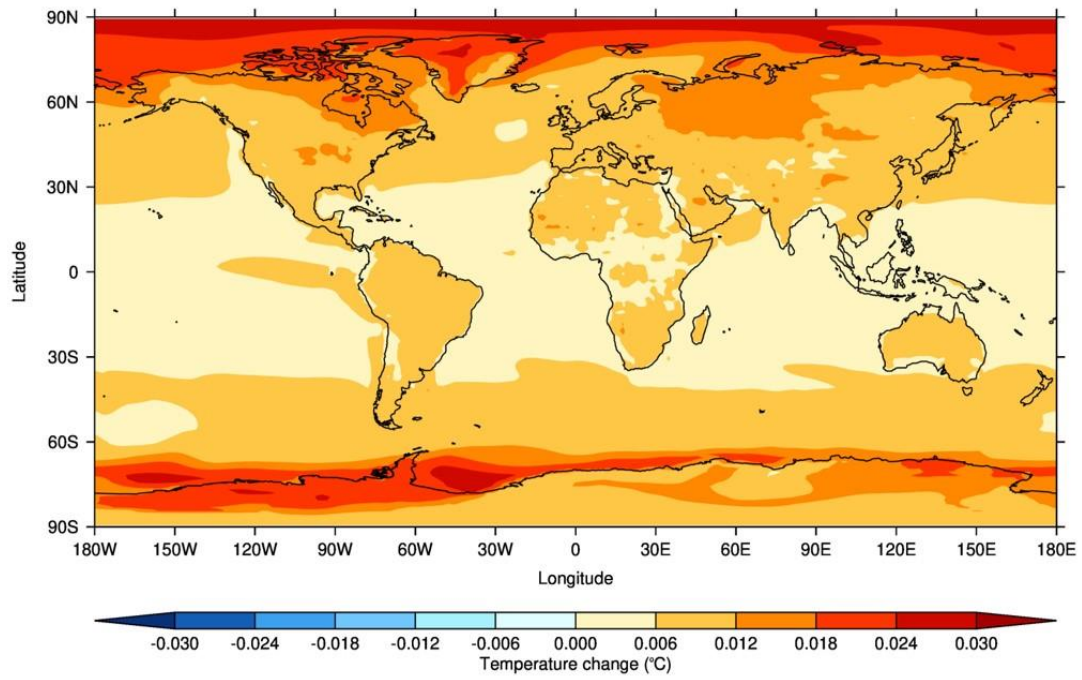

108  
 109  
 110  
 111  
 112

Figure S6 - Statistically significant (as calculated by a Mann-Kendall test, using the 99% level) centennial trends in 1.5m temperature from the HadGEM3 Pliocene *mPWP* simulation

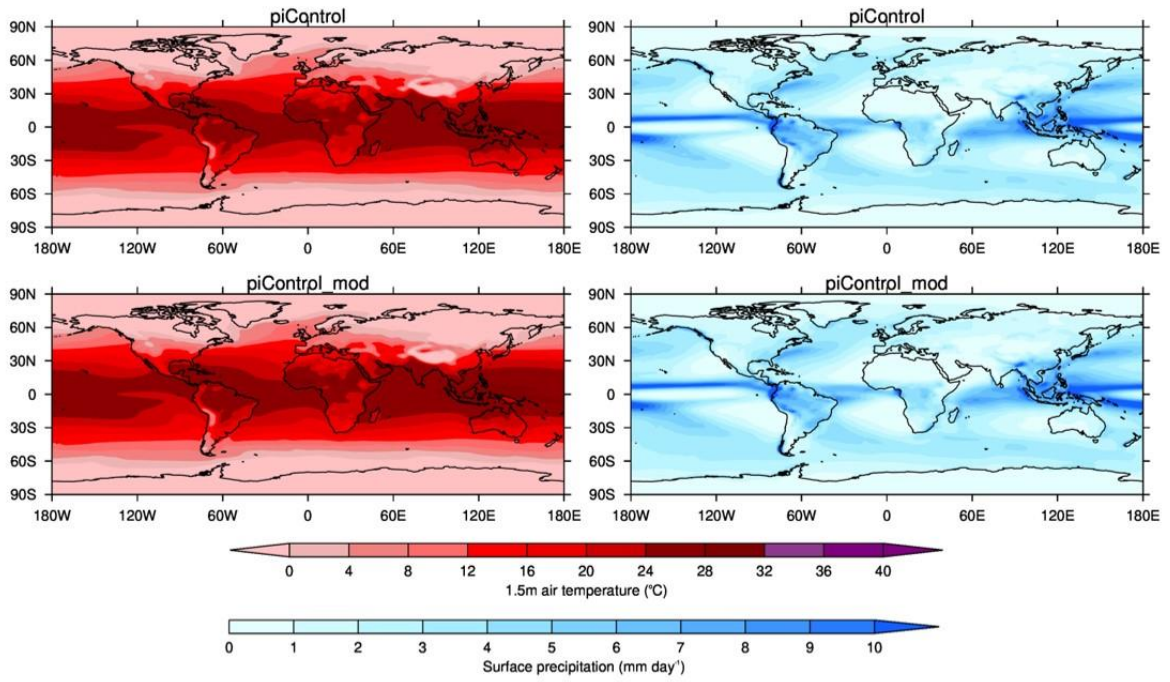

113  
 114  
 115  
 116  
 117

Figure S7 – PI climatologies from HadGEM3, calculated over the last 50 years of the simulations. Left-hand column: Annual mean 1.5 m air temperature, right-hand column: Annual mean surface precipitation

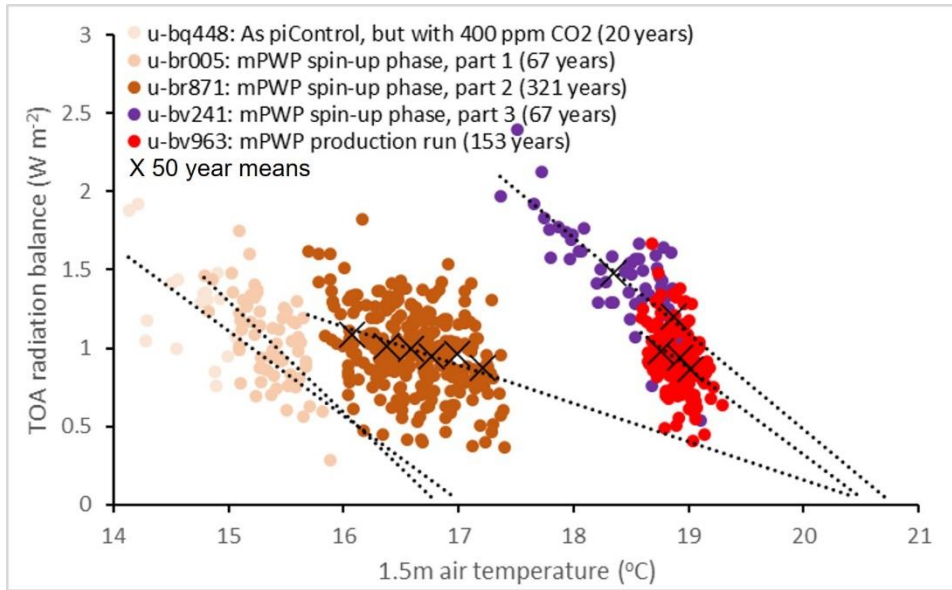

118  
 119  
 120  
 121  
 122  
 123  
 124

Figure S8 – Gregory plot of global mean net top of atmosphere (TOA) radiation versus 1.5 m air temperature from the HadGEM3 *mPWP* spin-up phase and production run. Coloured dots show annual means for each stage, crosses show 50 year means and dotted lines show 'line of best fit', projected forward until an equilibrium state (i.e. TOA radiation balance of 0 W m<sup>-2</sup>)

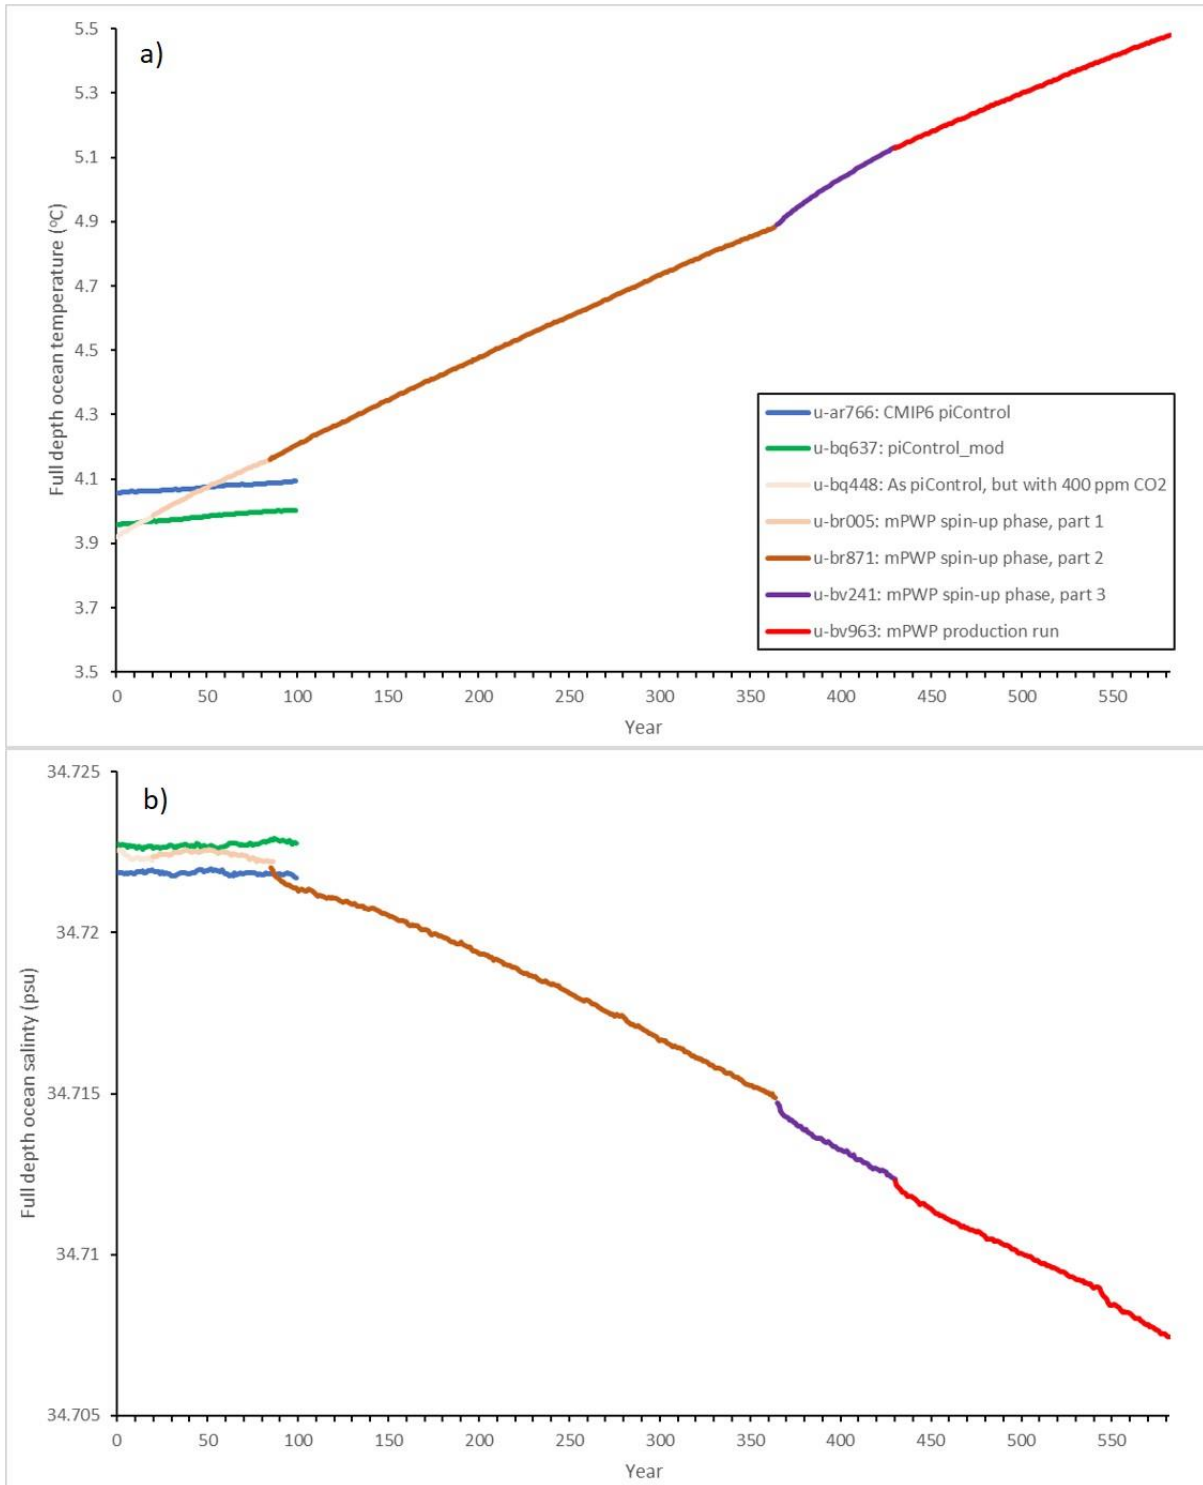

125

126

127

128

129

130

Figure 9 – Annual global mean measures of climate equilibrium from the HadGEM3 *mPWP* spin-up phase and production run, as well as the last 100 years from the CMIP6 *piControl* and the *piControl\_mod*. See Williams *et al.* (2020) for the *piControl* spin-up phase that preceded this simulation: a) Full depth ocean temperature, b) Full depth ocean salinity

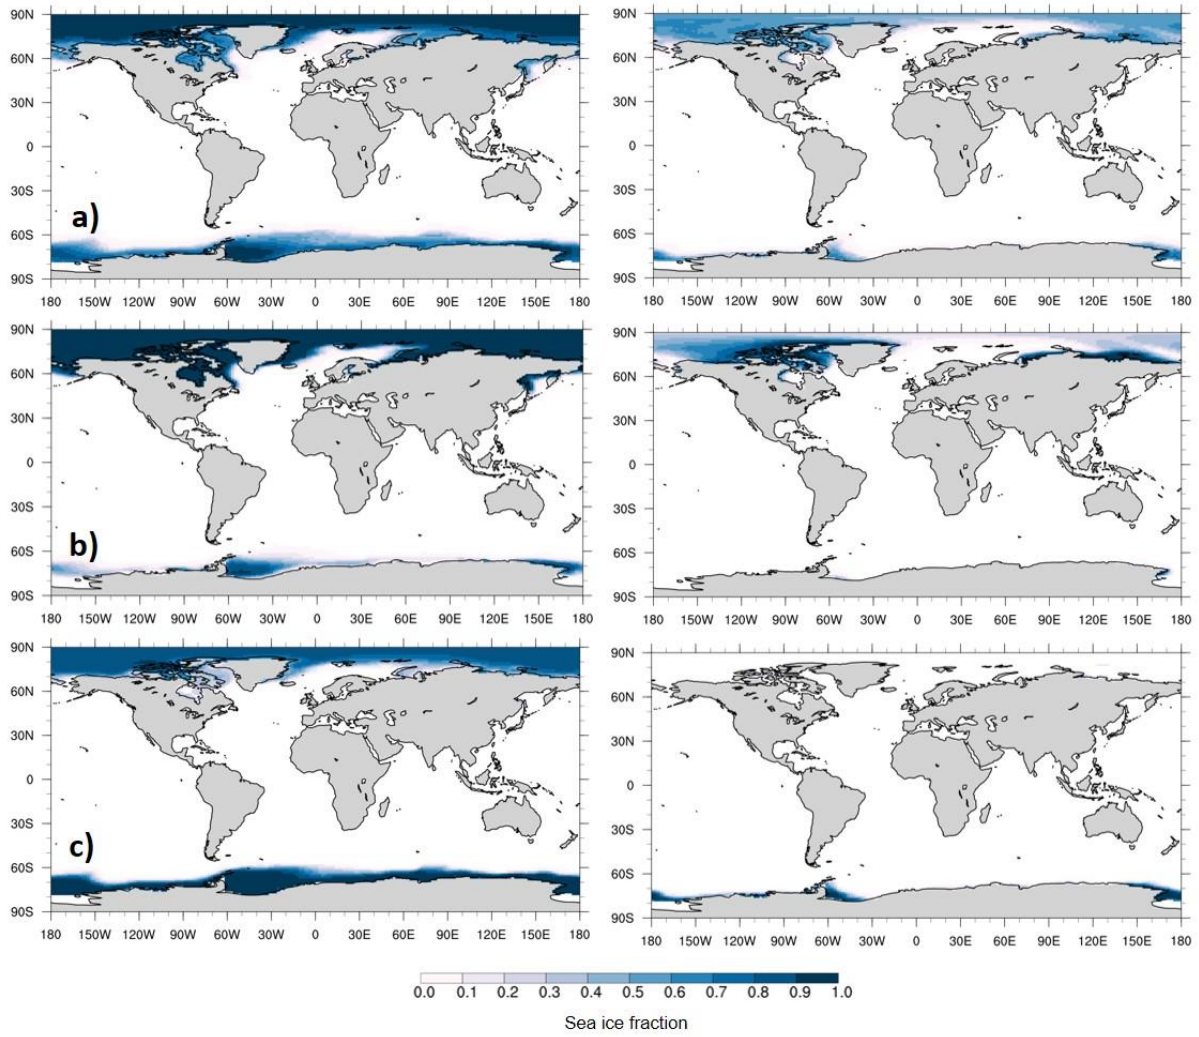

131  
 132 Figure S10 – Sea ice fraction climatology from HadGEM3. Left-hand column: *piControl\_mod*  
 133 simulation, right-hand column: *mPWP* simulation. a) Annual, b) DJF, c) JJA  
 134

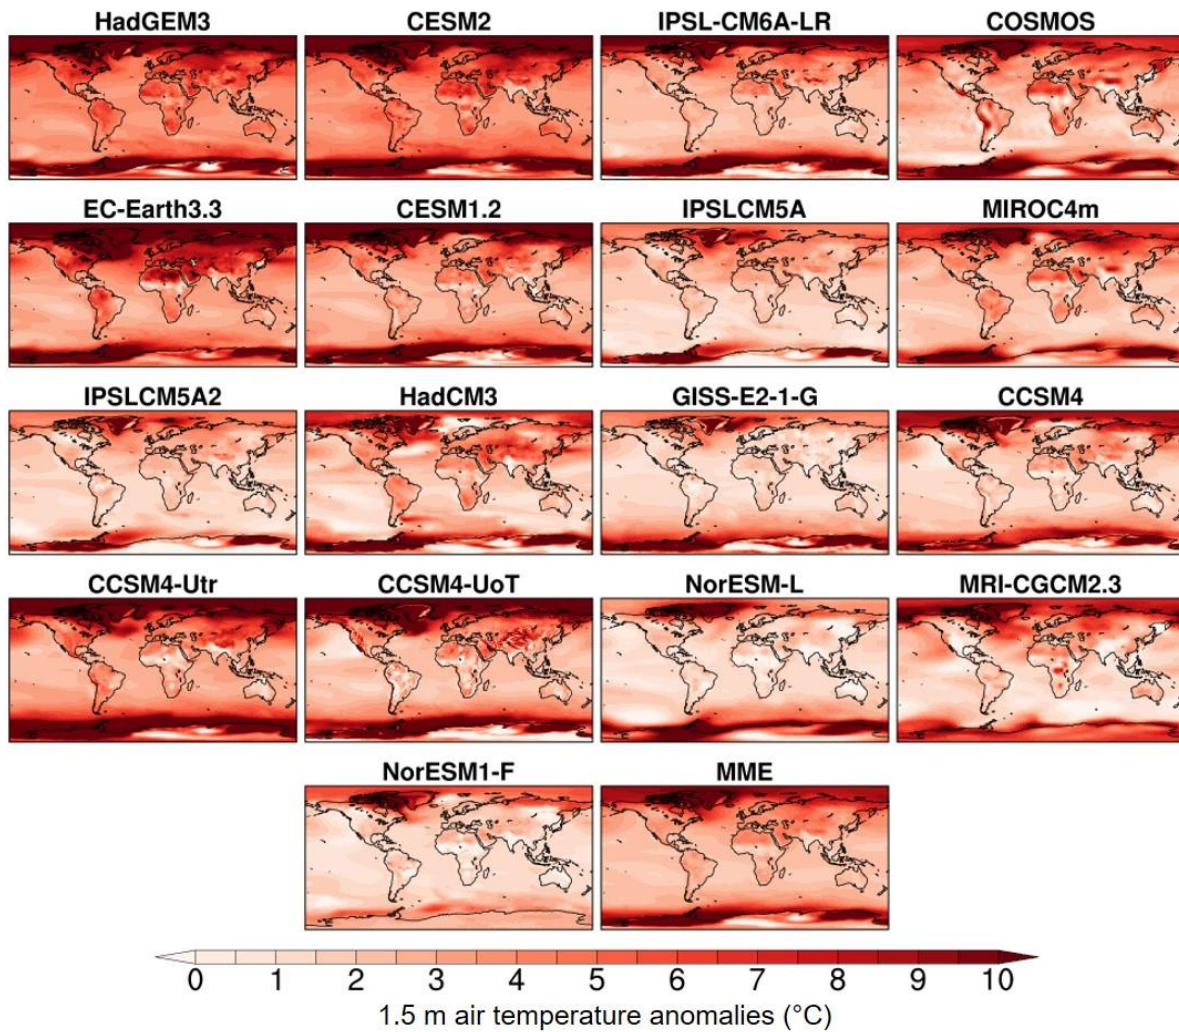

135

136

137 Figure S11 – 1.5 m air temperature climatology differences (Pliocene - PI) from HadGEM3 *mPWP*  
 138 simulation and all other models in PlioMIP2, as well as multi-model ensemble mean (MME)
